# Supplementary material
Source: Springer Nature journal article supplement (https://www.springermedizin.de/resource/supplementary/13231_2011_40_MOESM13_ESM.pdf/9676392)

Modified Bederson Score  
(arbitrary units)

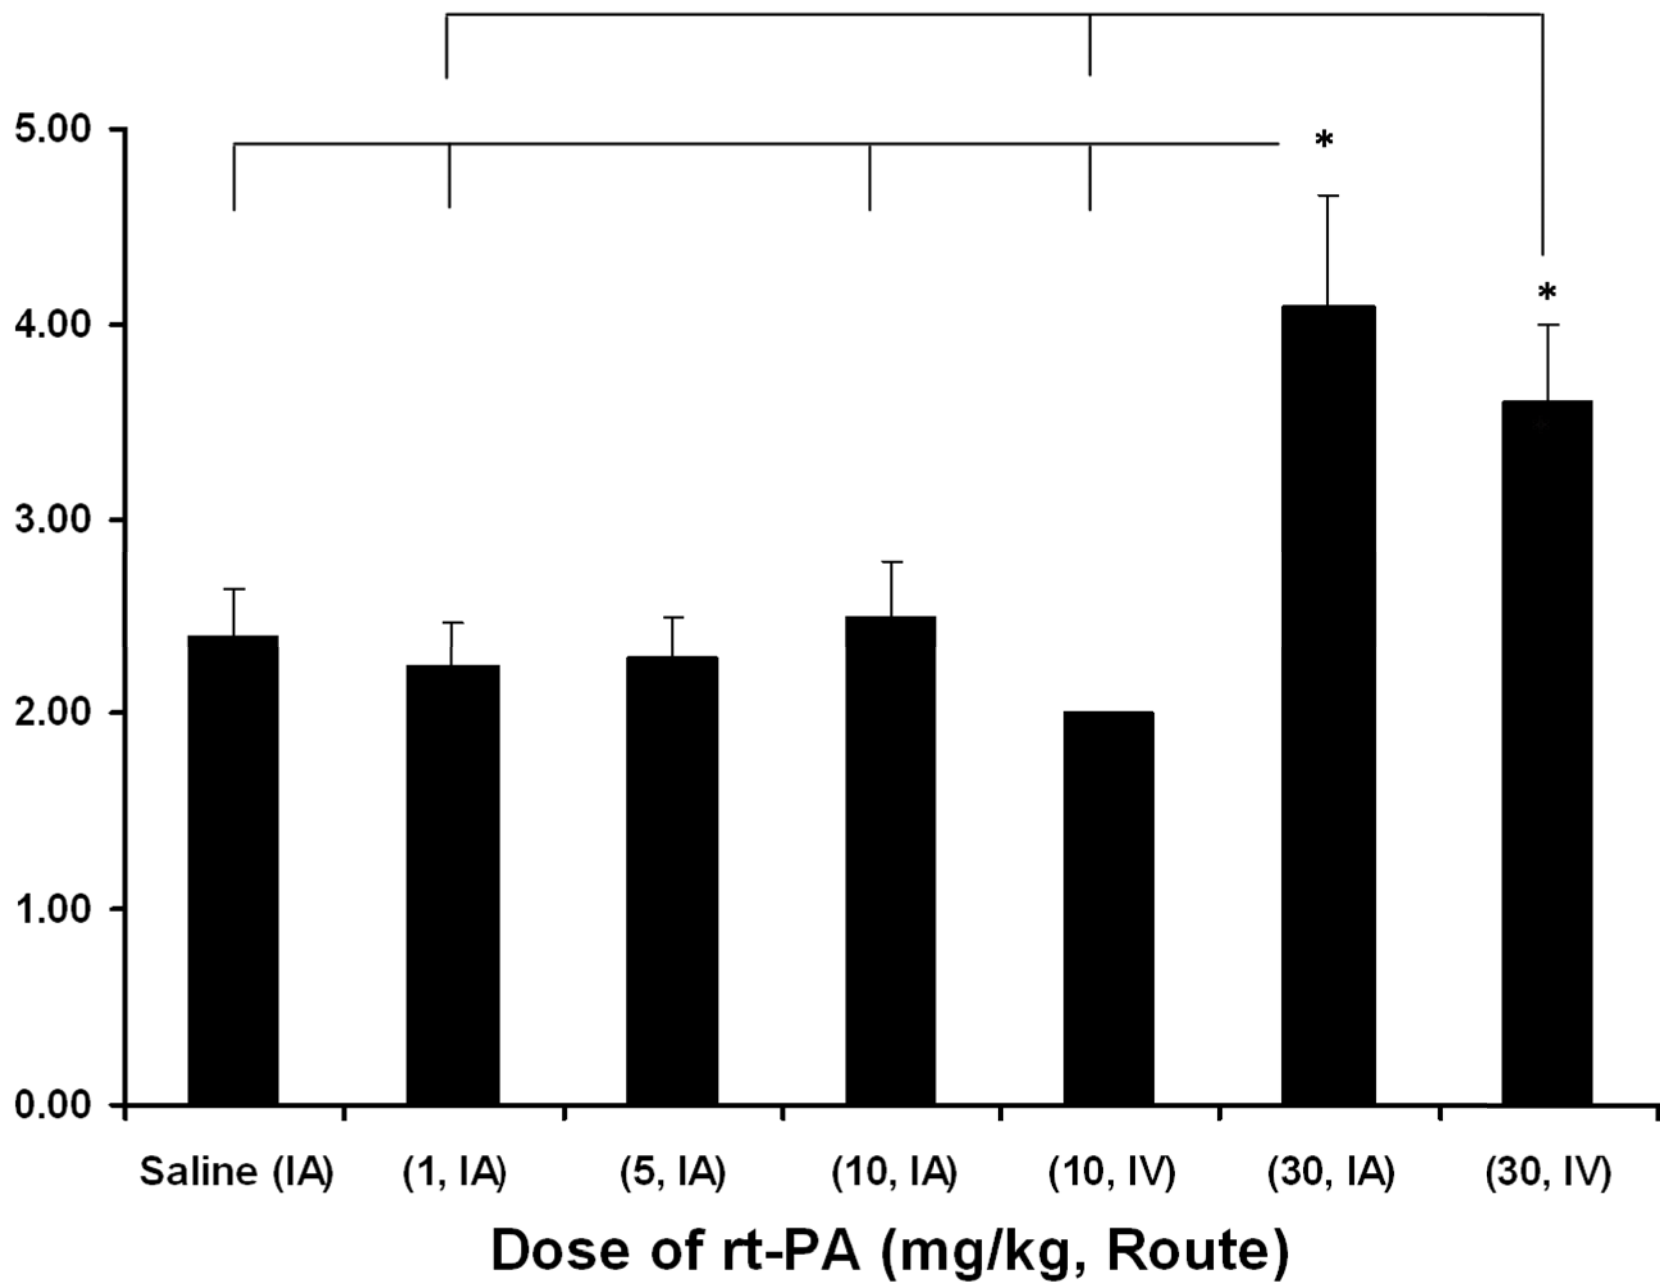

Supplement: MOESM13 [file 9676392]
